# Supplementary material for: Expanded Substrate Specificity in D-Amino Acid Transaminases: A Case Study of Transaminase from Blastococcus saxobsidens
Source: MDPI journal article supplement (doi:10.3390/ijms242216194), 2023-11-10
Supplement: s1 [file s1]

**Supplementary**  
**International Journal of Molecular Sciences**

**Expanded substrate specificity in D-amino acid transaminases: a case study of  
transaminase from *Blastococcus saxobsidens***

**Sofia A. Shilova<sup>1</sup>, Elizaveta S. Petrova<sup>1,2</sup>, Ilya O. Matyuta<sup>1</sup>, Alena Y. Nikolaeva<sup>1,3</sup>, Tatiana V. Rakitina<sup>1,4</sup>, Mikhail E. Minyaev<sup>5</sup>, Konstantin M. Boyko<sup>1</sup>, Vladimir O. Popov<sup>1</sup>, and Ekaterina Yu. Bezsudnova<sup>1,\*</sup>**

<sup>1</sup>Bach Institute of Biochemistry, Research Centre of Biotechnology, Russian Academy of Sciences, Moscow, Russia;

<sup>2</sup>Department of Chemistry, Lomonosov Moscow State University, Moscow, Russia

<sup>3</sup>Complex of NBICS Technologies, National Research Center “Kurchatov Institute”, Moscow, Russia;

<sup>4</sup>Shemyakin&Ovchinnikov Institute of Bioorganic Chemistry, Russian Academy of Sciences, Moscow, Russia

<sup>5</sup>N.D. Zelinsky Institute of Organic Chemistry, Russian Academy of Sciences, Moscow, Russia

<sup>6</sup>Department of Biology, Lomonosov Moscow State University, Moscow, Russia

\*Correspondence: eubez@inbi.ras.ru; [eubez@yandex.ru](mailto:eubez@yandex.ru)

**Content:**

|                          |             |
|--------------------------|-------------|
| <b>Figure S1-S2.....</b> | <b>p. 2</b> |
| <b>Figure S3.....</b>    | <b>p. 3</b> |
| <b>Figure S4.....</b>    | <b>p. 4</b> |
| <b>Table S1.....</b>     | <b>p. 5</b> |
| <b>Table S2.....</b>     | <b>p. 6</b> |
| <b>Table S3.....</b>     | <b>p. 7</b> |
| <b>Table S4.....</b>     | <b>p. 8</b> |

## Supplemented figures

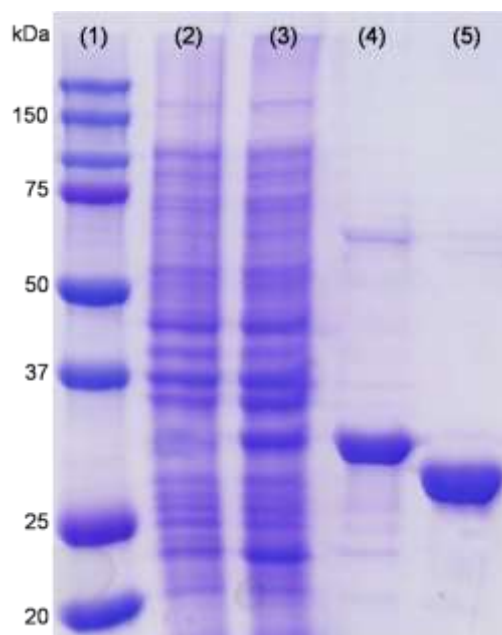

**Figure S1.** SDS-PAGE of steps of expression and purification of BlasaTA. (1) Precision Plus Protein Dual Color Standards (Bio-Rad, USA) (2) *E. coli* cell lysate before induction; (3) *E. coli* cell lysate after IPTG induction; (4) fraction of BlasaTA-(His)<sub>6</sub>TEV-tag after HisTrap HP column; (5) fraction of BlasaTA after cleavage of (His)<sub>6</sub>-tag, using TEV-protease, and following by gel-filtration.

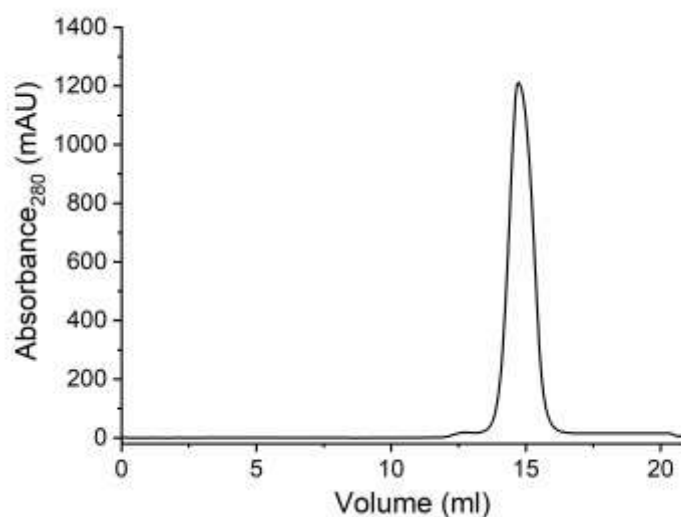

**Figure S2.** The gel filtration elution profile for BlasaTA. The major peak corresponds to the BlasaTA dimer. Chromatography was carried out on a 24 mL Superdex 200 10/300 GL column (Cytiva, USA) equilibrated with 50 mM HEPES buffer, pH 8.0, containing 100 mM NaCl, 1 mM DTT, and 100  $\mu$ M PLP.

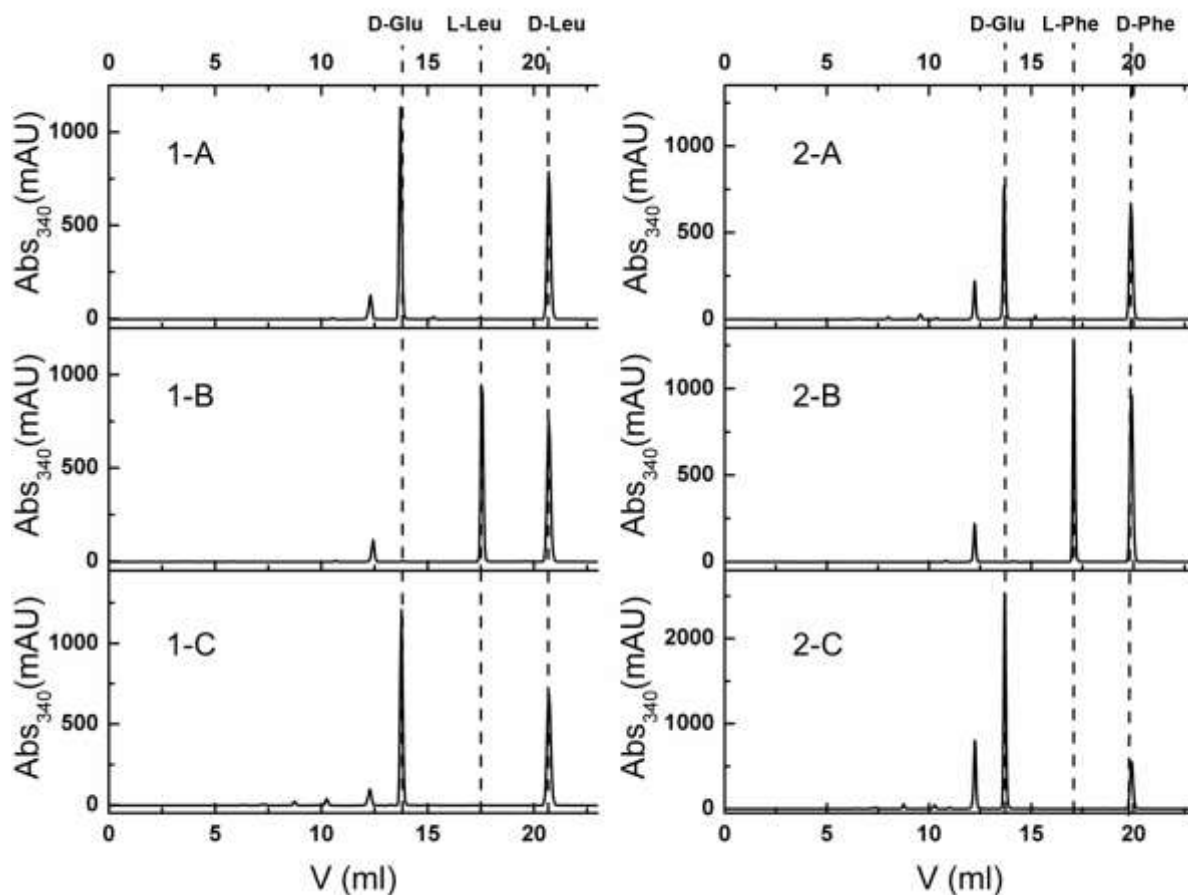

**Figure S3.** Determination of the enantiomeric excess in the reactions of *D*-glutamate + 4-methyl-2-oxovalerate (reaction I) and *D*-glutamate + phenylpyruvate (reaction II) catalyzed by BlasaTA. Chromatograms of standards and sample (leucine, phenylalanine and glutamate) derivatized with Marfey's reagent. 1-A: reference standards of D-glutamate and D-leucine at concentrations of 50 mM; 1-B: reference standards of D- and L-leucine at concentrations of 50 mM; 1-C: the reaction I sample. 2-A: reference standards of D-glutamate and D-phenylalanine at concentrations of 50 mM; 2-B: reference standards of D- and L-phenylalanine at concentrations of 50 mM; 2-C: the reaction II sample.

### **Derivatization conditions**

10  $\mu$ L of the reaction solution was mixed with 25  $\mu$ L of 10 mM Marfey's reagent ( $N_{\alpha}$ -(2,4-dinitro-5-fluorophenyl)-L-alanine amide, Sigma, USA) (2.5 eq) in acetonitrile and 10  $\mu$ L of 1 M  $\text{NaHCO}_3$  and incubated at 50  $^{\circ}\text{C}$  for 2 h. The reaction mixture was cooled to room temperature, and then the reaction was stopped by adding 3  $\mu$ L of 4 M HCl and 10  $\mu$ L of 100% ethanol.

### **HPLC analysis conditions**

The yields determination (method A):

Eluent – 20 mM Na-phosphate buffer, pH 3.0, 15% methanol

Flow rate – 1.0 mL/min

Injection volume – 20  $\mu$ L



## Supplemented tables

**Table S1.** The observed rate constants of half-reactions between the PLP-form of BlasaTA (35  $\mu\text{M}$ ) and amino donors in concentration of 5 mM in 50 mM K-phosphate buffer, pH 8.0, at 30  $^{\circ}\text{C}$ . ND- not detected.

| Amino acid               | Amino acid structure | $k_{\text{obs}}, \text{s}^{-1}$ | Amine                                       | Amine structure | $k_{\text{obs}}, \text{s}^{-1}$ |
|--------------------------|----------------------|---------------------------------|---------------------------------------------|-----------------|---------------------------------|
| D-Glutamate*             |                      | $1.3 \pm 0.1$                   | ( <i>R</i> )-1-Phenylethylamine             |                 | $0.00162 \pm 0.00006$           |
| D-Alanine*               |                      | $0.9 \pm 0.1$                   | ( <i>R</i> )-1-(4-Chlorophenyl)ethylamine   |                 | $0.0105 \pm 0.0001$             |
| D-Aspartate*             |                      | $0.43 \pm 0.05$                 | ( <i>R</i> )-1-(4-Bromophenyl)ethylamine    |                 | $0.0055 \pm 0.0003$             |
| D-Serine                 |                      | $0.13 \pm 0.01$                 | ( <i>R</i> )-1-Phenylpropylamine            |                 | $0.000144 \pm 0.000005$         |
| D-Valine                 |                      | $0.00091 \pm 0.00001$           | ( <i>R</i> )-1-Aminotetraline               |                 | $0.00836 \pm 0.00005$           |
| D-Norvaline              |                      | $0.75 \pm 0.08$                 | ( <i>R</i> )-1-(1-Naphthyl)ethylamine       |                 | ND                              |
| D-Leucine                |                      | $0.051 \pm 0.006$               | Benzhydrylamine                             |                 | ND                              |
| D-Phenylalanine          |                      | $0.018 \pm 0.003$               | ( <i>R,S</i> )-2-Amino-5-methylhexane       |                 | ND                              |
| D-Tryptophane            |                      | $0.52 \pm 0.05$                 | ( <i>R,S</i> )-1,3-Dimethylbutylamine       |                 | ND                              |
| D-Ornithine              |                      | $0.005 \pm 0.001$               | ( <i>S</i> )-1-Phenylethylamine             |                 | ND                              |
| D-Lysine                 |                      | $0.0018 \pm 0.0001$             | ( <i>S</i> )-1-Aminotetraline               |                 | ND                              |
| L-Glutamate              |                      | ND                              | ( <i>R,S</i> )-1-Methyl-3-phenylpropylamine |                 | ND                              |
| L-Alanine                |                      | ND                              | 3-Phenyl-1-propylamine                      |                 | ND                              |
| L-Leucine                |                      | ND                              | Isobutylamine                               |                 | ND                              |
| D,L-β-Aminobutanoic acid |                      | ND                              | Isopropylamine                              |                 | ND                              |
| γ-Aminobutanoic acid     |                      | ND                              | D,L-Alaninol                                |                 | ND                              |

\*half-reactions were performed with 100  $\mu\text{M}$  of amino donor

**Table S2.** Data collection, processing and refinement.

|                                                                         | <b>BlasaTA holo form</b> | <b>BlasaTA complexed with phenylhydrazine</b> |
|-------------------------------------------------------------------------|--------------------------|-----------------------------------------------|
| <b>Diffraction source</b>                                               | ESRF (ID23-1 beamline)   | Rigaku OD XtaLAB Synergy-S                    |
| <b>Wavelength (Å)</b>                                                   | 0.97                     | 1.54                                          |
| <b>Temperature (K)</b>                                                  | 100                      |                                               |
| <b>Detector</b>                                                         | PILATUS 6M               | HyPix-6000HE                                  |
| <b>Crystal-to-detector distance (mm)</b>                                | 125.5                    | 31.5                                          |
| <b>Rotation range per image (°)</b>                                     | 0.1                      | 0.25                                          |
| <b>Total rotation range (°)</b>                                         | 120                      | 240                                           |
| <b>Space group</b>                                                      | P3 <sub>1</sub> 21       | P3 <sub>1</sub> 21                            |
| <b><i>a</i>, <i>b</i>, <i>c</i> (Å)</b>                                 | 105.94, 105.94, 51.32    | 104.64, 104.64, 51.54                         |
| <b><math>\alpha</math>, <math>\beta</math>, <math>\gamma</math> (°)</b> | 90.0, 90.0, 120.0        | 90.0, 90.0, 120.0                             |
| <b>Average mosaicity (°)</b>                                            | 0                        | 1.19                                          |
| <b>Resolution range (Å)</b>                                             | 52.97-1.70 (1.73-1.70)   | 22.59-1.80 (1.84-1.80)                        |
| <b>Completeness (%)</b>                                                 | 97.4 (91.5)              | 99.6 (96.6)                                   |
| <b>Average redundancy</b>                                               | 3.5 (2.8)                | 12.9 (12.8)                                   |
| <b><math>\langle I/\sigma(I) \rangle</math></b>                         | 10.1 (1.3)               | 10.7 (1.9)                                    |
| <b>R<sub>meas</sub> (%)</b>                                             | 9.5 (61.3)               | 22.6 (158.2)                                  |
| <b>CC<sub>1/2</sub></b>                                                 | 99.4 (79.2)              | 99.6 (50.6)                                   |
| <b><i>R</i><sub>fact</sub> (%)</b>                                      | 17.1                     | 20.3                                          |
| <b><i>R</i><sub>free</sub>. (%)</b>                                     | 19.2                     | 25.4                                          |
| <b>RMSD Bonds (Å)</b>                                                   | 0.01                     | 0.01                                          |
| <b>RMSD Angles (°)</b>                                                  | 1.69                     | 1.79                                          |
| <b>Most favored (%)</b>                                                 | 97.8                     | 96.0                                          |
| <b>Allowed (%)</b>                                                      | 2.2                      | 4.0                                           |
| <b>PDB entry code</b>                                                   | 8PNW                     | 8PNY                                          |

**Table S3.** Superpositions of the BlasaTA subunit with subunits of PLP fold types IV TAs.

| TA from (PDB ID)                          | Activity type | RMSD, Å | Sequence identity, % |
|-------------------------------------------|---------------|---------|----------------------|
| <i>Geoglobus acetivarans</i> (5E25)       | BCAT          | 1.6     | 26                   |
| <i>Curtobacterium pusillum</i> (5K3W)     | DAAT + R-TA   | 1.7     | 40                   |
| <i>Haliscomenobacter hydrossis</i> (7P7X) | DAAT          | 1.7     | 24                   |
| <i>Aminobacterium colombiense</i> (8AHR)  |               | 1.7     | 19                   |
| <i>Bacillus</i> sp. YM-1 (4DAA)           |               | 1.7     | 20                   |
| <i>Aspergillus fumigatus</i> (4UUG)       | R-TA          | 1.8     | 19                   |
| <i>Nectria heamatococca</i> (4CMD)        |               | 1.9     | 21                   |
| <i>Thermobaculum terrenum</i> (6GKR)      | BCAT + R-TA   | 1.9     | 17                   |

**Table S4.** Structure-based sequence alignment of BlasaTA and DAATs. Amino acid composition of secondary structural elements forming the active sites of DAATs. Crystal structures of the following DAATs were analyzed: DAAT from *Bacillus* sp. YM-1(PDB ID 1DAA), from *B. sphaericus* (4TM5), from *C. pusillum* (5K3W), from *H. hydrossis* (7P7X) and from *A. colombiense* (8AHR). Amino acid residues known to participate in substrate binding are shown in red. Similar amino acid residues in homologs are shown in Bold. Positively charged residues in the P-pockets are shown in Bold and *Italic*. Canonical DAAT are highlighted in rose, non-canonical DAATs are shown in green.

| DAAT from                | O-pocket<br>$\alpha$ -helix                 | $\beta$ X-strand                                       | $\beta$ Y-strand                       | O-pocket loop                                           | Interdomain loop                           | $\beta$ -turn1                             | $\beta$ -turn2                             |
|--------------------------|---------------------------------------------|--------------------------------------------------------|----------------------------------------|---------------------------------------------------------|--------------------------------------------|--------------------------------------------|--------------------------------------------|
| <i>Bacillus</i> sp. YM-1 | <sup>21</sup> DRGYGFG <sup>27</sup>         | <sup>29</sup> GV <b>YE</b> VV <b>KVY</b> <sup>37</sup> | <sup>85</sup> GHIYFQVT <sup>92</sup>   | <sup>93</sup> RGTSP <b>RAHQ</b> FPENTVKP <sup>109</sup> | <sup>117</sup> NPRPLENLEKG <sup>128</sup>  | <sup>178</sup> GSSS <sup>181</sup>         | <sup>240</sup> STTS <sup>243</sup>         |
| <i>B. sphaericus</i>     | <sup>22</sup> DRGYQFG <sup>28</sup>         | <sup>30</sup> GIYEVI <b>KVY</b> <sup>38</sup>          | <sup>86</sup> GHVYFQIT <sup>93</sup>   | <sup>94</sup> RGTT <b>SRNH</b> IFPDASVPA <sup>110</sup> | <sup>119</sup> GERSIEQFEKG <sup>129</sup>  | <sup>179</sup> CSSA <sup>182</sup>         | <sup>241</sup> SVSS <sup>244</sup>         |
| <i>A. colombiense</i>    | <sup>22</sup> DLIIQ <b>RG</b> <sup>28</sup> | <sup>30</sup> GVFE <b>T</b> ISTH <sup>38</sup>         | <sup>85</sup> TMVRPYIT <sup>92</sup>   | <sup>93</sup> GDSFGKDHLFSSRYFV <sup>110</sup>           | <sup>115</sup> IRKPDPILYEKG <sup>126</sup> | <sup>173</sup> GS <b>HS</b> <sup>176</sup> | <sup>234</sup> GTV <b>K</b> <sup>237</sup> |
| <i>H. hydrossis</i>      | <sup>23</sup> DLSILRG <sup>29</sup>         | <sup>31</sup> GIFDYFLAR <sup>39</sup>                  | <sup>87</sup> AGIRLVLT <sup>94</sup>   | <sup>95</sup> GGYSPDGYTVNP <sup>107</sup>               | <sup>115</sup> DLPASAWFSAQG <sup>127</sup> | <sup>177</sup> SARS <sup>180</sup>         | <sup>238</sup> STIK <sup>241</sup>         |
| <i>C. pusillum</i>       | <sup>46</sup> DLGITRG <sup>52</sup>         | <sup>54</sup> GVFETIAVI <sup>62</sup>                  | <sup>114</sup> LFACLILT <sup>121</sup> | <sup>122</sup> RGIEGEGRP <sup>130</sup>                 | <sup>139</sup> GEDFSQQRLG <sup>148</sup>   | <sup>208</sup> GPTS <sup>211</sup>         | <sup>270</sup> SSV <b>R</b> <sup>273</sup> |
| <i>B. saxobsidens</i>    | <sup>29</sup> DLGLGR <sup>34</sup>          | <sup>37</sup> GIFESVAV <sup>44</sup>                   | <sup>93</sup> GVCRLFLT <sup>100</sup>  | <sup>101</sup> RGLGDGTPP <sup>109</sup>                 | <sup>118</sup> VPADTLRQRAEG <sup>129</sup> | <sup>189</sup> GPTS <sup>192</sup>         | <sup>251</sup> SGV <b>R</b> <sup>254</sup> |
